# Supplementary material for: Recombinant vector vaccine evolution
Source: PubMed Central journal article supplement (PMC6668849; doi:10.1371/journal.pcbi.1006857), 2019-07-19
Supplement: pcbi.1006857.s004.pdf [file pcbi.1006857.s004.pdf]

# Supplementary figure to: Recombinant Vector Vaccine

## Evolution

*James Bull and Scott L. Nuismer and Rustom Antia*

04/VI/2019

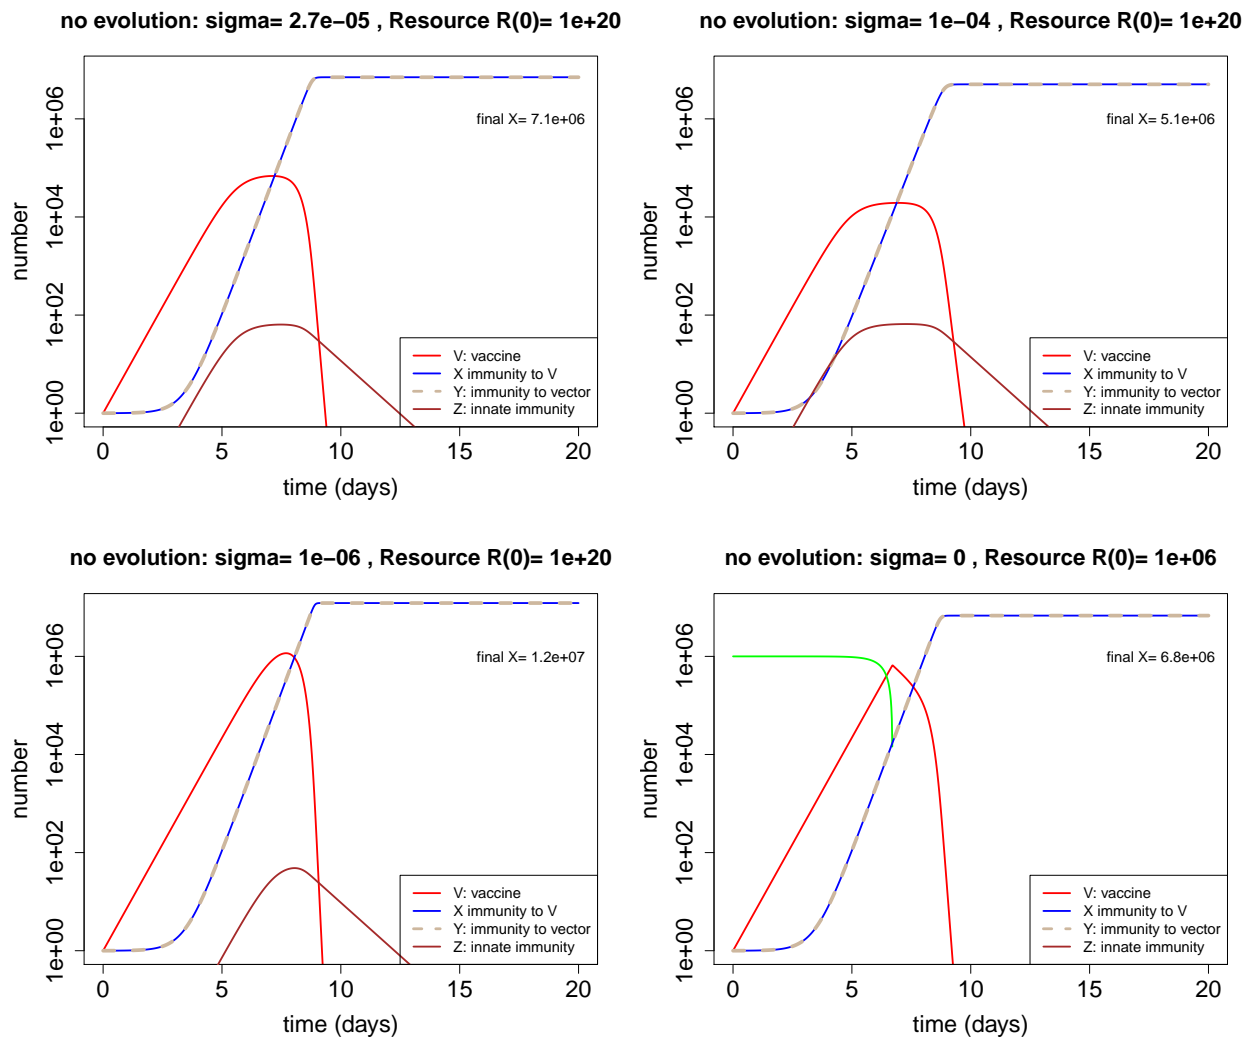

Figure 1: Dynamics with different values of  $\sigma$  and for Resource limitation (lower right panel)
