# Supplementary material for: Recombinant vector vaccine evolution
Source: PLoS Comput Biol. 2019 Jul 19;15(7):e1006857. doi: 10.1371/journal.pcbi.1006857 (PMC6668849; doi:10.1371/journal.pcbi.1006857)
Supplement: S1 File — This file was used to generate the figures in the paper but may also be used to run other conditions, such as the case when resource limitation controls the infection. (RMD) [file pcbi.1006857.s002.Rmd]

---
title: "Recombinant Vector Vaccines and within-host evolution"
author: "James Bull and Rustom Antia"
date: "10/5/2018"
output:
  pdf_document: default
  html_document:
    df_print: paged
  word_document: default
editor_options:
  chunk_output_type: console
bibliography: rvv1.bib
---

```{r setup, include=FALSE}
rm(list=ls())
setwd("~/Dropbox/Antia-Bull/Vaccines")
knitr::opts_chunk$set(echo = TRUE)     # what does this do?

library(deSolve) 
library(adaptivetau)
library(rootSolve)
#library(tidyverse)
#library(RefManageR)

```

#1. Description of the models for an infection


## Variables

Abbreviation  | Description                                 
--------------|----------------------------------------
V             | Vaccine                    
W             | Wild-type (revertant) vector
$V_A$         | Antigen from vaccine
$W_A$         | Antigen from vector
R             | Resource                          
X             | Specific response to recombinant (vaccine) antigen
Y             | Specific response to vector
Z             | Innate immune response


## Parameters

Abbreviation  | Description                                           | Values
--------------|-------------------------------------------------------|---------------
              | Intrinsic factors                                     |
r             | rate of growth of V                                   | 5 per day
c             | cost to having recombinant antigen                    | $0<c<1$
$\mu$         | mutation rate for V->W                                | $\mu<<1$
              | Resource limitation                                   |
a             | production of resource, R(0)=a/b                      |
b             | intrinsic clearance of resource                       |
$\phi_R$      | reseource for half max growth of W and V              | $\phi_R<<R(0)$
$d$           | death rate of virus-infected cells                    | 
              | Innate immunity                                       |
$s_Z$         | rate of stimulation of innate immunity                |
$\phi_Z$      | antigen for half max growth of innate immunity        |
$k_Z$         | killing rate of V due to Z (innate immunity)          |
$d_Z$         | decay of innate immunity in absence of antigen        |
              | Adaptive immunity                                     |
s             | rate of clonal expansion of adaptive immunity         |
$\phi_X$      |antigen for half max growth of adaptive immunity X     |
$\phi_Y$      |antigen for half max growth of adaptive immunity Y     |
$k_X$         | killing rate of V due to X (immunity to insert)       |
$k_Y$         | killing rate of V & W due to Y (immunity to vector)   |
$p_a$         | rate of production of antigen by virus                |
$d_a$         | rate of loss of virus antigen                         |


need to check table... add parameters 

## Equations

need to explain each term

$$ \frac{dR}{dt}= a - bR -r  V \frac{R}{\phi_R+R}  - r (1+c) W \frac{R}{\phi_R+R}$$
W and V grow on resource R at rates r and r(1-c) respectively with c = cost to vaccine insert

$$ \frac{dV}{dt}= r V \frac{R}{\phi_R+R}  - \mu V - d V - (k_X X + k_Y Y + k_Z Z) V  $$
terms for growth, mutation, death (otherwise it never decays in absence of immunity), killing by different immunity terms
$$ \frac{dW}{dt}=  r (1+c) W \frac{R}{\phi_R+R}  + \mu V - d W - (k_Y Y + k_Z Z) W  $$


$$ \frac{dX}{dt} = s X \frac{V_A}{\phi_X+V_A} $$


$$ \frac{dY}{dt} = s Y \frac{V_A+W_A}{\phi_Y+V_A+W_A} $$


$$ \frac{dZ}{dt} = \sigma (V+W)(100-Z) - d_Z Z$$ 


#3. Simulations of model 

##3.1 Equations and "background" parameters ...

```{r eqns&params, eval=T, echo=T, warning=T, message=T, error=T, include=T}

parameters=list(  
  r=3, #4,       # rate of growth of virus
  c=.1,          # 10% advantage of W (rather than cost ... keeps growth rate of V invariant with c)
  mu=0e-3,       # mutation rate V->W
  a=0,           # production of resource set to 0 for simplicity and let R(0) 
  b=0,           # removal of resource set to 0 for simplicity
  phi_R=1,       # resource conc for half max growth of virus
  d=1,           # death rate of infected cells/virus
  sigma=2.7e-5,         # 2.7e-5,  # 10,    # rate of stimulation of innate immunity
  k_Z=3e-2,      # 0.07,  # 0.06,  # rate of killing by innate immunity
  s=3,           # rate of clonal expansion of adaptive
  d_Z=1,         # decay of innate immunity  <-- d_Z=0/1 results in acute/persistent infection (innate immunity alone)
  phi_X=1e3,     # antigen for half max growth of adaptive immunity
  phi_Y=1e3,     # antigen for half max growth of adaptive immunity
  k_X=1e-6,      # rate of killing by adaptive response to transgene
  k_Y=1e-6,      # rate of killing by adaptive response to vector 
  Tmax=20,       # time of simulation
  R0= 1e20,      # initial resource <-- R0=2e5/1e20 gives +/- resource limitation
  V0=1,          # initial innoculum of vacccine
  W0=1,          # initial innoculum of revertant
  X0=1,          # initial immunity to vaccine antigen
  Y0=1,          # initial immunity to vector antigen
  Z0=0           # inital innate immunity
   )

# parameters for simulation 
tmax=parameters$Tmax
npoints=1000
time.points = seq(0, tmax, tmax/npoints)

###########################################
# ODE equations 
# simpler equations without the terms Va and Wa for "antigen"
growth.odes1<- function(t, y, parms){ 
  with(as.list(c(y,parms)),{
         R=max(0,R)          # avoid negative values (not ideal but ok)
         V=max(0,V)
         W=max(0,W)
         dR = - r*V*R/(phi_R+R)  - r*W*R*(1+c)/(phi_R+R) + a - b*R    
         dV =  r*V*R/(phi_R+R)       - d*V - mu*V - k_Z*Z*V - k_Y*Y*V - k_X*X*V 
         dW =  r*(1+c)*W*R/(phi_R+R) - d*W + mu*V - k_Z*Z*W - k_Y*Y*W
         dX =  s*X*V/(phi_X+V)                     
         dY =  s*Y*(V+W)/(phi_Y+V+W)  
         dZ=  sigma*(V+W)*(100-Z) - d_Z*Z
         dy= c(dR, dV, dW, dX, dY, dZ)
  return(list(dy))
  })    }
init.cond1=c(R=parameters$R0, V=parameters$V0, W=parameters$W0, X=parameters$X0, Y=parameters$Y0, Z=parameters$Z0)
############################################

# choose which function to use
growth.odes=growth.odes1
init.cond=init.cond1

# function to calculate the outcome of an infection 
# We want.  VL for V and W VL_V and VL_W, and final vaccine immunity X_tmax and Y_tmax
Results <- function(mu,c,V0,W0){
  parameters$mu=mu
  parameters$c=c
  init.cond["V"]=V0
  init.cond["W"]=W0

    soln1=as.data.frame(ode(y=init.cond, time=time.points, growth.odes, parms=parameters) )

    return(c(VL_V=sum(soln1$V)*(tmax/npoints), VL_W=sum(soln1$W)*(tmax/npoints), X_F= tail(soln1$X)[1], Y_F= tail(soln1$Y)[1]) )
}

Results2 <- function(V0,W0,X0,Y0){

  init.cond["V"]=V0
  init.cond["W"]=W0
  init.cond["X"]=X0
  init.cond["Y"]=Y0

  soln1=as.data.frame(ode(y=init.cond, time=time.points, growth.odes, parms=parameters) )

    return(c(VL_V=sum(soln1$V)*(tmax/npoints), VL_W=sum(soln1$W)*(tmax/npoints), X_F= tail(soln1$X)[1], Y_F= tail(soln1$Y)[1]) )
}

Results3 <- function(k_X,k_Y){

  parameters$k_X=k_X
  parameters$k_Y=k_Y

  soln1=as.data.frame(ode(y=init.cond, time=time.points, growth.odes, parms=parameters) )

    return(c(VL_V=sum(soln1$V)*(tmax/npoints), VL_W=sum(soln1$W)*(tmax/npoints), X_F= tail(soln1$X)[1], Y_F= tail(soln1$Y)[1]) )
}
```


##3.2 Simulations for innate + adaptive immunity <-- innate immunity controls but does not clear infection


```{r Figure4new, eval=T, echo=T, warning=T, message=T, error=T, include=F}
<<eqns&params>>

# for no evolution and no resource limitation make sure the initial value of R is high in the parameters file
init.cond["W"]=0

# # uncomment to see effect of innate immunity alone or varying innate immunity
# parameters$k_X=0
# parameters$k_Y=0
# parameters$sigma=1e-6
#init.cond["R"]=2e5
# # end uncomment for innate immunity alone

soln1=as.data.frame(ode(y=init.cond, time=time.points, growth.odes, parms=parameters) )
# plot ode model

#uncomment line below to plot to file 
#pdf("figure4a.pdf", width=8, height=6)  # open a file
#tiff.res=600
#tiff("figure4a.tiff", width = 7*tiff.res, height = 6*tiff.res, units = "px", res = tiff.res)
postscript("figure4a.eps", width = 8, height = 6, onefile = "FALSE", paper = "special")

plot1=plot(soln1$time,soln1$V, log="y", col="red", lwd=2, type="l", ylim=c(1,1e7), xlab="time (days)", ylab="number", main=paste("no evolution: W(0)=",init.cond["W"]/init.cond["V"]),cex.main = 2,cex.axis=1.6,cex.lab=1.6)
#plot1=plot(soln1$time,soln1$V, log="y", col="red", lwd=2, type="l", ylim=c(1,1e7), xlab="time (days)", ylab="number", main=paste("no evolution: c=", parameters$c,", W(0)=",init.cond["W"]/init.cond["V"]),cex.main = 2,cex.axis=1.6,cex.lab=1.6)
lines(soln1$time, soln1$R, col="green", type="l", lwd=2)
lines(soln1$time, soln1$W, col="orange", type="l", lwd=2)
#lines(soln1$time, soln1$Va, col="red", type="l", lwd=2, lty=2)
#lines(soln1$time, soln1$Wa, col="orange", type="l", lwd=2, lty=2)
lines(soln1$time, soln1$X, col="blue", type="l", lwd=2, lty=1)
lines(soln1$time, soln1$Y, col="bisque3", type="l", lwd=4, lty=2)
lines(soln1$time, soln1$Z, col="brown", type="l", lwd=2, lty=1)
legend("bottomright",cex=1.3,c("V: vaccine","X immunity to V","Y: immunity to vector","Z: innate immunity"),lty=c(1,1,2,1), col=c("red",  "blue", "bisque3","brown"), lwd=c(2,2,3,2))
text(15, 1e6,cex=2,paste("final X=",format(tail(soln1$X,1),digits=2,scientific=T)))

#uncomment line below to plot to file 
dev.off()

###########################
# plot with no fitness difference but with 50:50 wt:mu
# this is new figure 4b

<<eqns&params>>

# change parameters for adding evolution (no cost) and W(0)=V(0) 
parameters$c=0.0      # cost of 1%
init.cond["V"]=0.5*init.cond["V"]
init.cond["W"]=init.cond["V"]

soln2=as.data.frame(ode(y=init.cond, time=time.points, growth.odes, parms=parameters) )

soln2$R=0    # put the resource at 0 so as to not interfere with the ylim in the plot routine below

# uncomment to plot to file
#pdf("figure4b.pdf", width=8, height=6) 
postscript("figure4b.eps", width = 8, height = 6, onefile = "FALSE", paper = "special")
plot1=plot(soln2$time,soln2$V, log="y", col="red", lwd=2, type="l", ylim=c(1,1e7), xlab="time (days)", ylab="number", main=paste ("evolution: c=", parameters$c, ", W(0)=",init.cond["W"]/init.cond["V"],"x V[0]"), cex.main = 2, cex.axis=1.6,cex.lab=1.6)
lines(soln2$time, soln2$Z, col="brown", type="l", lwd=2, lty=1)
lines(soln2$time, soln2$W, col="orange", type="l", lwd=2, lty=1)
lines(soln2$time, soln2$X, col="blue", type="l", lwd=2, lty=1)
lines(soln2$time, soln2$Y, col="bisque3", type="l", lwd=2, lty=1)
legend("bottomright",cex=1.3, c("V: vaccine","W: wt vector","innate immunity", "immunity to V", "immunity to vector"),lty=c(1,1,1,1,1,1,3),lwd=c(3,3,3,3,3,2,2), col=c("red", "orange", "brown", "blue", "bisque3", "black", "black"))
text(15, 1e6,cex=2, paste("final X=",format(tail(soln2$X,1),digits=2,scientific=T)))

# uncomment to plot to file
dev.off()

###########################
# plot with high fitness difference but with low freq of mu
# this is new figure 4c

<<eqns&params>>

# change parameters for adding evolution with high cost and at low initial frequency and W(0) 
parameters$c=0.2      # cost of 1%
init.cond["V"]=0.99*init.cond["V"]
init.cond["W"]=0.01*init.cond["V"]

soln2=as.data.frame(ode(y=init.cond, time=time.points, growth.odes, parms=parameters) )

soln2$R=0    # put the resource at 0 so as to not interfere with the ylim in the plot routine below

# uncomment to plot to file
#pdf("figure4c.pdf", width=8, height=6) 
postscript("figure4c.eps", width = 8, height = 6, onefile = "FALSE", paper = "special")
plot1=plot(soln2$time,soln2$V, log="y", col="red", lwd=2, type="l", ylim=c(1,1e7), xlab="time (days)", ylab="number", main=paste ("evolution: c=", parameters$c, ", W(0)=",init.cond["W"]/init.cond["V"],"x V[0]"),cex.main = 2,cex.axis=1.6,cex.lab=1.6)

lines(soln2$time, soln2$Z, col="brown", type="l", lwd=2, lty=1)
lines(soln2$time, soln2$W, col="orange", type="l", lwd=2, lty=1)
lines(soln2$time, soln2$X, col="blue", type="l", lwd=2, lty=1)
lines(soln2$time, soln2$Y, col="bisque3", type="l", lwd=2, lty=1)
legend("bottomright", cex=1.3,c("V: vaccine","W: wt vector","innate immunity", "immunity to V", "immunity to vector"),lty=c(1,1,1,1,1,1,3),lwd=c(3,3,3,3,3,2,2), col=c("red", "orange", "brown", "blue", "bisque3", "black", "black"))
text(15, 1e6, cex=2, paste("final X=",format(tail(soln2$X,1),digits=2,scientific=T)))

# uncomment to plot to file
dev.off()


###########################
# plot with high fitness difference and with high initial freq of W
# this is new figure 4d

<<eqns&params>>

# change parameters for adding evolution and W(0) 
parameters$c=0.2      # cost of 1%
init.cond["V"]=0.5*init.cond["V"]
init.cond["W"]=init.cond["V"]

soln2=as.data.frame(ode(y=init.cond, time=time.points, growth.odes, parms=parameters) )

soln2$R=0    # put the resource at 0 so as to not interfere with the ylim in the plot routine below

# uncomment to plot to file
#pdf("figure4d.pdf", width=8, height=6) 
postscript("figure4d.eps", width = 8, height = 6, onefile = "FALSE", paper = "special")
plot1=plot(soln2$time,soln2$V, log="y", col="red", lwd=2, type="l", ylim=c(1,1e7), xlab="time (days)", ylab="number", main=paste ("evolution: c=", parameters$c, ", W(0)=",init.cond["W"]/init.cond["V"],"x V[0]"),cex.main = 2,cex.axis=1.6,cex.lab=1.6)
lines(soln2$time, soln2$Z, col="brown", type="l", lwd=2, lty=1)
lines(soln2$time, soln2$W, col="orange", type="l", lwd=2, lty=1)
lines(soln2$time, soln2$X, col="blue", type="l", lwd=2, lty=1)
lines(soln2$time, soln2$Y, col="bisque3", type="l", lwd=2, lty=1)
legend("bottomright", cex=1.3,c("V: vaccine","W: wt vector","innate immunity", "immunity to V", "immunity to vector"),lty=c(1,1,1,1,1,1,3),lwd=c(3,3,3,3,3,2,2), col=c("red", "orange", "brown", "blue", "bisque3", "black", "black"))
text(15, 1e6,cex=2, paste("final X=",format(tail(soln2$X,1),digits=2,scientific=T)))

# uncomment to plot to file
dev.off()

 
```
 
\begin{figure}[h]
\includegraphics[width=.3\linewidth]{figure4a.pdf}      \includegraphics[width=.3\linewidth]{figure4b.pdf}\\
\includegraphics[width=.3\linewidth]{figure4c.pdf}     \includegraphics[width=.3\linewidth]{figure4d.pdf}\\
\caption{Dynamics of infection (figure 4 in document)}
\end{figure}
 

```{r Figures5-7, eval=T, echo=T, warning=T, message=T, error=T, include=F, cache=T}

<<eqns&params>>

###########################################
# 2D plot for VL as a function of W(0) (x-axis) and cost of the transgene (y-axis)

# plot log10[W(0)] on x-axis
x_min=-1
x_max=+1
  
# plot cost of recombinant antigen for vector

y_min=0
y_max=.1

x_vals= 10  #20   # <-- for higher resolution
y_vals= 10  #20

mu=parameters$mu
v0=parameters$V0

z1=matrix(0,x_vals+1,y_vals+1)  # matrix for Virus load 
z2=matrix(0,x_vals+1,y_vals+1)  # matrix for final immunity to vaccine

for (i in 1:(x_vals+1)){  
   x=x_min+(x_max-x_min)*(i-1)/x_vals
      for (j in 1:(y_vals+1)){
        y=y_min+(y_max-y_min)*(j-1)/y_vals

        w0 = 10^x   
        c  = y
        
        z1[i,j]=(Results(mu,c,v0,w0)["VL_V"][[1]])
        z2[i,j]=(Results(mu,c,v0,w0)["X_F"][[1]])

  } }

x=seq(x_min,x_max,(x_max-x_min)/x_vals)
y=seq(y_min,y_max,(y_max-y_min)/y_vals)

z1_min=floor(log10(min(z1)))
z1_max=ceiling(log10(max(z1)))
par(mfrow=c(1,2))
#######################################################################################
# plot to file (uncomment line below and the assoicated dev.off()
pdf("figure5L.pdf", width=7, height=6) 
par(mar = c(4.5,4.5,5,0) + 0.1)
plot2=filled.contour(x, y, log10(z1), 
               zlim = c(z1_min,z1_max),
               color.palette=function(x)rev(heat.colors(x)) , nlevels=10, 
                plot.title = title(  main = "Vaccine Load (VL)", 
                                     xlab = " log10 [W(0)]" ,
                                    ylab = "cost c",cex.main = 2.3,line=3.0,cex.axis=2.0,cex.lab=2.0),
               key.title = title("Log(VL)",cex.main=1.3),key.axes=axis(4)
)
dev.off()

z2_min=floor(log10(min(z2)))
z2_max=ceiling(log10(max(z2)))
###############################################################################################
# plot to file (uncomment line below and the assoicated dev.off()
 pdf("figure5R.pdf", width=7, height=6) 
 par(mar = c(4.5,4.5,5,0) + 0.1)
 #op <- par(mar = c(5,4.1,4,2) + 0.1)
plot3=filled.contour(x, y, log10(z2), 
               zlim = c(z2_min,z2_max), 
               color.palette=function(x)rev(heat.colors(x)) , nlevels=10, 
               
                plot.title = title(  main = "Immunity to antigen (X)", 
                                     xlab = " log10 [W(0)]" ,
                                    ylab = "cost c ",cex.main = 2.3,line=3.0,cex.axis=2.0,cex.lab=2.0),
               key.title = title("Log(X)",cex.main=1.3),key.axes=axis(4)
)
 dev.off()

 ###########################################
# CAN CHANGING THE INNOCULUM PREVENT THE REDUCTION IN VL
# 2D plot for VL as a function of innoculum size (x-axis) and frequency of W in the innoculum (y-axis)

c=0.1

# plot total innoculum on x-axis log10(W0+V0)
x_min=0
x_max=4

# plot fraction W in innoculum on the y-axis 
y_min=0
y_max=.9

x_vals= 10  #22
y_vals= 10   #20

z1=matrix(0,x_vals+1,y_vals+1)  # matrix for Virus load 
z2=matrix(0,x_vals+1,y_vals+1)  # matrix for immunity to V 

for (i in 1:(x_vals+1)){  
   x=x_min+(x_max-x_min)*(i-1)/x_vals
      for (j in 1:(y_vals+1)){
        y=y_min+(y_max-y_min)*(j-1)/y_vals
        fracW=y
        w0 = fracW*10^x   
        v0 = (1-fracW)*10^x 
        z1[i,j]=(Results(mu,c,v0,w0)["VL_V"][[1]])
        z2[i,j]=(Results(mu,c,v0,w0)["X_F"][[1]])
      }
}

x=seq(x_min,x_max,(x_max-x_min)/x_vals)
y=seq(y_min,y_max,(y_max-y_min)/y_vals)
###################################################################################

pdf("figure_manip.pdf", width=7, height=6) 
 op <- par(mar = c(5,4.5,5,0) + 0.1)
plot4=filled.contour(x, y, log10(z2), 
              zlim = c(z2_min,z2_max),
               color.palette=function(x)rev(heat.colors(x)) , nlevels=10, 
                plot.title = title(  main = "Manipulate the innoculum", 
                                     xlab = " log (innoculum size)" ,
                                    ylab = "initial revertant fraction",line=2.8,cex.main = 2.3,cex.axis=2.0,cex.lab=2.0),
               key.title = title("log(X)",cex.main=1.3),key.axes=axis(4)
)
dev.off()


 ###########################################
# EFFECT OF CHANGING EFFICACY OF IMMUNTIY TO X AND Y
# 2D plot for VL as a function of k_X on the x-axis and k_Y on the y-axis 
# to generate figure5noE.pdf, change initial conditions for W = 0.

<<eqns&params>>
init.cond["R"]=1e20  # <- no resource limitation 

init.cond["W"]=0
init.cond["V"]=1-init.cond["W"]
parameters$c=.00
  
# plot log k_X on the x-axis
logkx=log10(parameters$k_X)
x_min= logkx-2
x_max= logkx+2

# plot log k_Y on the x-axis
logky=log10(parameters$k_Y)
y_min= logky-2
y_max= logky+2

#
x_vals= 10  #22
y_vals= 10  #20

z1=matrix(0,x_vals+1,y_vals+1)  # matrix for Virus load 
z2=matrix(0,x_vals+1,y_vals+1)  # matrix for immunity to V 

for (i in 1:(x_vals+1)){  
    kX=10^(x_min+(x_max-x_min)*(i-1)/x_vals)
      for (j in 1:(y_vals+1)){
        kY=10^(y_min+(y_max-y_min)*(j-1)/y_vals)
 
        z1[i,j]=(Results3(kX,kY)["VL_V"][[1]])
        z2[i,j]=(Results3(kX,kY)["X_F"][[1]])
      }
}

x=seq(x_min,x_max,(x_max-x_min)/x_vals)
y=seq(y_min,y_max,(y_max-y_min)/y_vals)
#################################################################################################

# plot to file (uncomment line below and the assoicated dev.off()
pdf("figure6noE.pdf", width=7, height=6) 
par(mar = c(4.4,4.8,4,0) + 0.1)
#op <- par(mar = c(5,4.1,4,2) + 0.1)
plot6=filled.contour(x, y, log10(z2), 
#              zlim = c(z2_min,z2_max),
                zlim=c(4,9),
               color.palette=function(x)rev(heat.colors(x)) , nlevels=10, 
               plot.title = title(main=paste("revertant absent"), 
                                     xlab = " log (k_X)" ,
                                    ylab = "log (k_Y) ",cex.main = 2.5,cex.axis=2.0,cex.lab=2.0),
               key.title = title("log(X)",cex.main=1.3),key.axes=axis(4)
)
dev.off()


<<eqns&params>>
init.cond["R"]=1e20  # <- no resource limitation 
init.cond["W"]=.75
init.cond["V"]=1-init.cond["W"]
parameters$c=.00
  
# plot log k_X on the x-axis
logkx=log10(parameters$k_X)
x_min= logkx-2
x_max= logkx+2

# plot log k_Y on the x-axis
logky=log10(parameters$k_Y)
y_min= logky-2
y_max= logky+2

#
x_vals= 10  #22
y_vals= 10  #20

z1=matrix(0,x_vals+1,y_vals+1)  # matrix for Virus load 
z2=matrix(0,x_vals+1,y_vals+1)  # matrix for immunity to V 

for (i in 1:(x_vals+1)){  
    kX=10^(x_min+(x_max-x_min)*(i-1)/x_vals)
      for (j in 1:(y_vals+1)){
        kY=10^(y_min+(y_max-y_min)*(j-1)/y_vals)
 
        z1[i,j]=(Results3(kX,kY)["VL_V"][[1]])
        z2[i,j]=(Results3(kX,kY)["X_F"][[1]])
      }
}

x=seq(x_min,x_max,(x_max-x_min)/x_vals)
y=seq(y_min,y_max,(y_max-y_min)/y_vals)

###################################################################################
# plot to file (uncomment line below and the assoicated dev.off()
pdf("figure6E.pdf", width=7, height=6) 
#op <- par(mar = c(5,4.1,4,2) + 0.1)
par(mar = c(4.4,4.8,4,0) + 0.1)
plot6=filled.contour(x, y, log10(z2), 
#              zlim = c(z2_min,z2_max),
                zlim=c(4,9),
               color.palette=function(x)rev(heat.colors(x)) , nlevels=10, 
               plot.title = title(main=paste("revertant present"), 
                                     xlab = " log (k_X)" ,
                                    ylab = "log (k_Y) ",cex.main = 2.5,cex.axis=2.0,cex.lab=2.0),
               key.title = title("log(X)",cex.main=1.3),key.axes=axis(4)
)
dev.off()

```


\begin{figure}[h]
\includegraphics[width=.45\linewidth]{figure5L.pdf}      \includegraphics[width=.45\linewidth]{figure5R.pdf}\\
\caption{Viral load and immunity (Figure 5 in document) }
\end{figure}

\begin{figure}[h]
\includegraphics[width=.45\linewidth]{figure6noE.pdf}     \includegraphics[width=.45\linewidth]{figure6E.pdf}\\
\caption{Immunity as a function of $k_X$ and $k_Y$ (Figure 6 in document)  }
\end{figure}

\begin{figure}[h]
\includegraphics[width=.6\linewidth]{figure_manip.pdf}\\
\caption{Dependence on innoculum (Figure 7 in document) }
\end{figure}


#4.0: Appendix.  Simple consideration of robustness of the basic model

We consider how the basic dynamics of infection and immunity is robust to:
1. Value of sigma (threshold for stimulation of innate immunity)
2. Change from innate immunity to resource limitation

```{r FigureSI, eval=T, echo=T, warning=T, message=T, error=T, include=F}
<<eqns&params>>

# for no evolution and no resource limitation
init.cond["W"]=0

# # uncomment to see effect of innate immunity alone or varying innate immunity
# parameters$k_X=0
# parameters$k_Y=0
#parameters$sigma=1e-6
#init.cond["R"]=2e5
# # end uncomment for innate immunity alone

soln1=as.data.frame(ode(y=init.cond, time=time.points, growth.odes, parms=parameters) )
# plot ode model

#uncomment line below to plot to file 
pdf("figure4SIa.pdf", width=7, height=6)  # open a file
#tiff.res=600
#tiff("figure4a.tiff", width = 7*tiff.res, height = 6*tiff.res, units = "px", res = tiff.res)
#postscript("figure4a.eps", width = 7, height = 6, onefile = "FALSE", paper = "special")

plot1=plot(soln1$time,soln1$V, log="y", col="red", lwd=2, type="l", ylim=c(1,1e7), xlab="time (days)", ylab="number", main=paste("no evolution: sigma=", parameters$sigma,", Resource R(0)=",init.cond["R"]),cex.main = 1.5,cex.axis=1.6,cex.lab=1.6)
lines(soln1$time, soln1$R, col="green", type="l", lwd=2)
lines(soln1$time, soln1$W, col="orange", type="l", lwd=2)
#lines(soln1$time, soln1$Va, col="red", type="l", lwd=2, lty=2)
#lines(soln1$time, soln1$Wa, col="orange", type="l", lwd=2, lty=2)
lines(soln1$time, soln1$X, col="blue", type="l", lwd=2, lty=1)
lines(soln1$time, soln1$Y, col="bisque3", type="l", lwd=4, lty=2)
lines(soln1$time, soln1$Z, col="brown", type="l", lwd=2, lty=1)
legend("bottomright", c("V: vaccine","X immunity to V","Y: immunity to vector","Z: innate immunity"),lty=c(1,1,2,1), col=c("red",  "blue", "bisque3","brown"), lwd=c(2,2,3,2))
text(18, 1e6,paste("final X=",format(tail(soln1$X,1),digits=2,scientific=T)))

#legend("right", c("R: resource","V: vaccine","W: wt vector","X immunity to insert","Y: immunity to vector","Z: innate immunity"),lty=1, col=c("green", "red", "orange",  "blue", "orange","brown"), lwd=2)

#uncomment line below to plot to file 
dev.off()


####################################################

# change innate immunity to 1e-4

init.cond["W"]=0

# # uncomment to see effect of innate immunity alone or varying innate immunity
parameters$sigma=1e-4
# # end uncomment for innate immunity alone

soln1=as.data.frame(ode(y=init.cond, time=time.points, growth.odes, parms=parameters) )
# plot ode model

#uncomment line below to plot to file 
pdf("figure4SIb.pdf", width=7, height=6)  # open a file
#tiff.res=600
#tiff("figure4a.tiff", width = 7*tiff.res, height = 6*tiff.res, units = "px", res = tiff.res)
#postscript("figure4a.eps", width = 7, height = 6, onefile = "FALSE", paper = "special")

plot1=plot(soln1$time,soln1$V, log="y", col="red", lwd=2, type="l", ylim=c(1,1e7), xlab="time (days)", ylab="number", main=paste("no evolution: sigma=", parameters$sigma,", Resource R(0)=",init.cond["R"]),cex.main = 1.5,cex.axis=1.6,cex.lab=1.6)
lines(soln1$time, soln1$R, col="green", type="l", lwd=2)
lines(soln1$time, soln1$W, col="orange", type="l", lwd=2)
#lines(soln1$time, soln1$Va, col="red", type="l", lwd=2, lty=2)
#lines(soln1$time, soln1$Wa, col="orange", type="l", lwd=2, lty=2)
lines(soln1$time, soln1$X, col="blue", type="l", lwd=2, lty=1)
lines(soln1$time, soln1$Y, col="bisque3", type="l", lwd=4, lty=2)
lines(soln1$time, soln1$Z, col="brown", type="l", lwd=2, lty=1)
legend("bottomright", c("V: vaccine","X immunity to V","Y: immunity to vector","Z: innate immunity"),lty=c(1,1,2,1), col=c("red",  "blue", "bisque3","brown"), lwd=c(2,2,3,2))
text(18, 1e6,paste("final X=",format(tail(soln1$X,1),digits=2,scientific=T)))

#legend("right", c("R: resource","V: vaccine","W: wt vector","X immunity to insert","Y: immunity to vector","Z: innate immunity"),lty=1, col=c("green", "red", "orange",  "blue", "orange","brown"), lwd=2)

#uncomment line below to plot to file 
dev.off()


####################################################
# change innate immunity to 1e-6

init.cond["W"]=0

# # uncomment to see effect of innate immunity alone or varying innate immunity
parameters$sigma=1e-6
# # end uncomment for innate immunity alone

soln1=as.data.frame(ode(y=init.cond, time=time.points, growth.odes, parms=parameters) )
# plot ode model

#uncomment line below to plot to file 
pdf("figure4SIc.pdf", width=7, height=6)  # open a file

plot1=plot(soln1$time,soln1$V, log="y", col="red", lwd=2, type="l", ylim=c(1,1e7), xlab="time (days)", ylab="number", main=paste("no evolution: sigma=", parameters$sigma,", Resource R(0)=",init.cond["R"]),cex.main = 1.5,cex.axis=1.6,cex.lab=1.6)
lines(soln1$time, soln1$R, col="green", type="l", lwd=2)
lines(soln1$time, soln1$W, col="orange", type="l", lwd=2)
#lines(soln1$time, soln1$Va, col="red", type="l", lwd=2, lty=2)
#lines(soln1$time, soln1$Wa, col="orange", type="l", lwd=2, lty=2)
lines(soln1$time, soln1$X, col="blue", type="l", lwd=2, lty=1)
lines(soln1$time, soln1$Y, col="bisque3", type="l", lwd=4, lty=2)
lines(soln1$time, soln1$Z, col="brown", type="l", lwd=2, lty=1)
legend("bottomright", c("V: vaccine","X immunity to V","Y: immunity to vector","Z: innate immunity"),lty=c(1,1,2,1), col=c("red",  "blue", "bisque3","brown"), lwd=c(2,2,3,2))
text(18, 1e6,paste("final X=",format(tail(soln1$X,1),digits=2,scientific=T)))

#legend("right", c("R: resource","V: vaccine","W: wt vector","X immunity to insert","Y: immunity to vector","Z: innate immunity"),lty=1, col=c("green", "red", "orange",  "blue", "orange","brown"), lwd=2)

#uncomment line below to plot to file 
dev.off()

####################################################
# change innate immunity to zero and RL to smaller value

init.cond["W"]=0

# # uncomment to see effect of innate immunity alone or varying innate immunity
parameters$sigma=0
init.cond["R"]=1e6
# # end uncomment for innate immunity alone

soln1=as.data.frame(ode(y=init.cond, time=time.points, growth.odes, parms=parameters) )
# plot ode model

#uncomment line below to plot to file 
pdf("figure4SId.pdf", width=7, height=6)  # open a file

plot1=plot(soln1$time,soln1$V, log="y", col="red", lwd=2, type="l", ylim=c(1,1e7), xlab="time (days)", ylab="number", main=paste("no evolution: sigma=", parameters$sigma,", Resource R(0)=",init.cond["R"]),cex.main = 1.5,cex.axis=1.6,cex.lab=1.6)
lines(soln1$time, soln1$R, col="green", type="l", lwd=2)
lines(soln1$time, soln1$W, col="orange", type="l", lwd=2)
#lines(soln1$time, soln1$Va, col="red", type="l", lwd=2, lty=2)
#lines(soln1$time, soln1$Wa, col="orange", type="l", lwd=2, lty=2)
lines(soln1$time, soln1$X, col="blue", type="l", lwd=2, lty=1)
lines(soln1$time, soln1$Y, col="bisque3", type="l", lwd=4, lty=2)
lines(soln1$time, soln1$Z, col="brown", type="l", lwd=2, lty=1)
legend("bottomright", c("V: vaccine","X immunity to V","Y: immunity to vector","Z: innate immunity"),lty=c(1,1,2,1), col=c("red",  "blue", "bisque3","brown"), lwd=c(2,2,3,2))
text(18, 1e6,paste("final X=",format(tail(soln1$X,1),digits=2,scientific=T)))

#legend("right", c("R: resource","V: vaccine","W: wt vector","X immunity to insert","Y: immunity to vector","Z: innate immunity"),lty=1, col=c("green", "red", "orange",  "blue", "orange","brown"), lwd=2)

#uncomment l

dev.off()


```

\begin{figure}[h]
\includegraphics[width=.3\linewidth]{figure4SIa.pdf}      \includegraphics[width=.3\linewidth]{figure4SIb.pdf}\\
\includegraphics[width=.3\linewidth]{figure4SIc.pdf}     \includegraphics[width=.3\linewidth]{figure4SId.pdf}\\
\caption{Supplementary material.  Dynamics with diferent values of $\sigma$ and for Resource limitation (last panel) }
\end{figure}
